# Supplementary material for: Valorization of Spent Brewer’s Yeast for the Production of High-Value Products, Materials, and Biofuels and Environmental Application
Source: MDPI journal article supplement (doi:10.3390/fermentation9030208), 2023-02-23
Supplement: s1 [file s1]

**Table S1.** Production of high-value products from spent brewer's yeast.

| High-value product | Yeast strain                        | Process conditions                                                                                                                                                                                                                                                                                                                                                                                                                                                                                                                                                                                                                                                                                                                                                                                                                                                                                             | The aim of the research                                                                                                                                  | Reference |
|--------------------|-------------------------------------|----------------------------------------------------------------------------------------------------------------------------------------------------------------------------------------------------------------------------------------------------------------------------------------------------------------------------------------------------------------------------------------------------------------------------------------------------------------------------------------------------------------------------------------------------------------------------------------------------------------------------------------------------------------------------------------------------------------------------------------------------------------------------------------------------------------------------------------------------------------------------------------------------------------|----------------------------------------------------------------------------------------------------------------------------------------------------------|-----------|
| $\beta$ -glucan    | <i>Saccharomyces uvarum</i>         | <ol style="list-style-type: none"> <li>1) Hot water treatment (water bath with mild agitation; 30% (w/w) cell suspension; pH 5.0; 3% w/v NaCl; <math>T = 55\text{ }^{\circ}\text{C}</math>; <math>t = 24\text{ h}</math>)</li> <li>2) Autolysis (<math>T = 85\text{ }^{\circ}\text{C}</math>; <math>t = 15\text{ min}</math>; centrifuge, <math>n = 4500\text{ g}</math>, <math>t = 10\text{ min}</math>)</li> <li>3) Sonication (20 kHz and 150 W in an ice bath; <math>t = 2, 4\text{ and }6\text{ min}</math>; 10, 15 and 20% cell dilution)</li> <li>4) Proteolysis (protamex enzyme; pH 7.5; <math>T = 55\text{ }^{\circ}\text{C}</math>; <math>t = 5\text{ h}</math>)</li> <li>5) Dialysis (distilled water; <math>t = 8\text{ h}</math>)</li> <li>6) Lyophilization (frozen; <math>T = -20\text{ }^{\circ}\text{C}</math>, dried under vacuum; <math>T = -80\text{ }^{\circ}\text{C}</math>)</li> </ol> | Production of $\beta$ -glucan as protective agent of probiotic <i>Lactobacillus cultures</i> with potential application as a functional food ingredient. | [30]      |
|                    | <i>Saccharomyces carlsbergensis</i> | <ol style="list-style-type: none"> <li>1) Alkaline extraction (6% w/v NaOH; <math>T = 90\text{ }^{\circ}\text{C}</math>; <math>t = 2\text{ h}</math>; centrifuge, <math>n = 6000\text{ rpm}</math>, <math>T = 4\text{ }^{\circ}\text{C}</math>, <math>t = 10\text{ min}</math>)</li> <li>2) <math>\beta</math>-glucan production (addition of 3% w/v molasses and 0.1% w/v diammonium sulfate (MDS) medium supplemented with 0.1 % w/v tannic acid).</li> </ol>                                                                                                                                                                                                                                                                                                                                                                                                                                                | Enhanced production of $\beta$ -glucan with the addition of tannic acid for use in prebiotics and functional supplements.                                | [31]      |
|                    | <i>Saccharomyces pastorianus</i>    | <ol style="list-style-type: none"> <li>1) Autolysis (<math>T = 50\text{ }^{\circ}\text{C}</math>; <math>t = 24\text{ h}</math>)</li> <li>2) Alkaline extraction (1.0 N NaOH; <math>T = 80 \pm 5\text{ }^{\circ}\text{C}</math>; <math>t = 2\text{ h}</math>)</li> <li>3) Acid extraction (0.5 N <math>\text{CH}_3\text{COOH}</math>; <math>T = 75 \pm 5\text{ }^{\circ}\text{C}</math>; <math>t = 1\text{ h}</math>)</li> <li>4) Lyophilized and milled</li> </ol>                                                                                                                                                                                                                                                                                                                                                                                                                                             | Improvement of bread nutritional and health properties using $\beta$ -glucan rich extract in the baking process.                                         | [32]      |
| Mannoprotein       | <i>Saccharomyces uvarum</i>         | <ol style="list-style-type: none"> <li>1) Hot water treatment (water bath with mild agitation; 30% (w/w) cell suspension; pH 5.0; 3% w/v NaCl; <math>T = 55\text{ }^{\circ}\text{C}</math>; <math>t = 24\text{ h}</math>)</li> <li>2) Autolysis (<math>T = 85\text{ }^{\circ}\text{C}</math>; <math>t = 15\text{ min}</math>, centrifuge, <math>n = 4500\text{ g}</math>, <math>t = 10\text{ min}</math>)</li> <li>3) Extraction (absolute ethanol 3:1; <math>T = 4\text{ }^{\circ}\text{C}</math>; <math>t = 18\text{ h}</math>)</li> <li>4) Precipitation (absolute ethanol; <math>n = 4500\text{ g}</math>; <math>T = 10\text{ }^{\circ}\text{C}</math>; <math>t = 5\text{ min}</math>)</li> <li>5) Dialysis (distilled water; <math>t = 48\text{ h}</math>)</li> <li>6) Lyophilization</li> </ol>                                                                                                          | The use of mannoprotein as a substitute for xanthan gum in mayonnaise, with emulsifying and stabilizing properties.                                      | [33]      |
|                    | <i>Saccharomyces uvarum</i>         | <ol style="list-style-type: none"> <li>1) Autolysis (<math>T = 55\text{ }^{\circ}\text{C}</math>; <math>t = 24\text{ h}</math>; <math>n = 120\text{ rpm}</math>)</li> <li>2) Hot water treatment (<math>T = 121\text{ }^{\circ}\text{C}</math>; <math>t = 4\text{ h}</math>; centrifuge, <math>n = 4500\text{ g}</math>, <math>t = 7\text{ min}</math>)</li> <li>3) Extraction (absolute ethanol 3:1; <math>T = 4\text{ }^{\circ}\text{C}</math>; <math>t = 18\text{ h}</math>)</li> <li>4) Precipitation (absolute ethanol; <math>n = 4500\text{ g}</math>; <math>T = 10\text{ }^{\circ}\text{C}</math>; <math>t = 5\text{ min}</math>)</li> <li>5) Lyophilization</li> </ol>                                                                                                                                                                                                                                 | The use of mannoprotein as an additive to French salad dressing for the purpose of emulsification and stabilization.                                     | [34]      |

|                                    |                                  |                                                                                                                                                                                                                                                                                                                                                                                                                                                                                                                                                                                                                                                        |                                                                                                                                     |      |
|------------------------------------|----------------------------------|--------------------------------------------------------------------------------------------------------------------------------------------------------------------------------------------------------------------------------------------------------------------------------------------------------------------------------------------------------------------------------------------------------------------------------------------------------------------------------------------------------------------------------------------------------------------------------------------------------------------------------------------------------|-------------------------------------------------------------------------------------------------------------------------------------|------|
| Protein                            | <i>Saccharomyces pastorianus</i> | 1) Enzymatic hydrolysis (proteolytic enzymes: Brauzyn®, Alcalase™, Protamex™ and Flavourzyme™; $T = 60\text{ }^{\circ}\text{C}$ ; pH 5.5; 10 % enzyme/substrate ratio; 100% substrate concentration)                                                                                                                                                                                                                                                                                                                                                                                                                                                   | Production and recovery of crude proteins and antioxidant components from SBY by enzymatic hydrolysis.                              | [28] |
| Hop acid                           | Unknown                          | 1) Sonication (spent yeast paste: methanol-phosphoric acid; $T = 25\text{ }^{\circ}\text{C}$ ; $t = 18\text{ min}$ ; vortexed $t = 2\text{ min}$ )<br>2) Centrifuge ( $n = 4000\text{ g}$ ; $t = 5\text{ min}$ )<br>3) Dilution of supernatant (40 mL of water-phosphoric acid)                                                                                                                                                                                                                                                                                                                                                                        | Production of hop acid with antioxidant, anti-inflammatory, anti-cancer and antibacterial activity as a functional food supplement. | [35] |
| Succinic acid                      | Unknown                          | 1) Autolysis ( $T = 55\text{ }^{\circ}\text{C}$ ; $t = 72$ ; $n = 120\text{ rpm}$ ; centrifuge, $t = 15\text{ min}$ , $T = 4\text{ }^{\circ}\text{C}$ , $n = 8000\text{ rpm}$ )<br>2) Enzymatic hydrolysis (Alcalase (Novozymes); $T = 60\text{ }^{\circ}\text{C}$ ; $t = 12\text{ h}$ ; $n = 200\text{ rpm}$ ; centrifuge, $t = 15\text{ min}$ , $T = 4\text{ }^{\circ}\text{C}$ , $n = 8000\text{ rpm}$ )<br>3) Batch fermentation ( <i>Actinobacillus succinogenes</i> ; $T = 37\text{ }^{\circ}\text{C}$ ; $n = 200\text{ rpm}$ ; $\text{CO}_2$ flow rate of 0.5 L/min)                                                                            | Production of succinic acid by <i>A. succinogenes</i> , with the addition of vitamins to improve production.                        | [36] |
| Glutamic acid                      | Unknown                          | 1) Enzymatic hydrolysis (proteases from <i>Bacillus</i> SK II-5; SBY solution; $T = 50\text{ }^{\circ}\text{C}$ ; $t = 12\text{ h}$ ; centrifuge, $t = 10\text{ min}$ , $T = 4\text{ }^{\circ}\text{C}$ , $n = 8000\text{ rpm}$ )                                                                                                                                                                                                                                                                                                                                                                                                                      | Production of monosodium glutamate and glutamic acid by enzymatic hydrolysis of SBY with proteases.                                 | [37] |
| $\gamma$ -aminobutyric acid (GABA) | <i>Saccharomyces cerevisiae</i>  | 1) Autolysis (7% dry SBY + sterile distilled water + monosodium glutamate (0.060 mol/L) + D-(+)-glucose monohydrate (0.266 mol/L))<br>2) Acid-alkali hydrolysis (2N HCl or 2N NaOH; $T = 37\text{ }^{\circ}\text{C}$ ; $t = 72\text{ h}$ ; $n = 100\text{ rpm}$ )<br>3) Heating ( $T = 85\text{ }^{\circ}\text{C}$ ; $t = 15\text{ min}$ )                                                                                                                                                                                                                                                                                                             | Production of GABA in autolytically processed yeast extract.                                                                        | [38] |
| 5'-nucleotides                     | <i>Saccharomyces pastorianus</i> | 1) Yeast disruption (phosphate buffer; pH 7)<br>a) Physical method ( $T = 50\text{ }^{\circ}\text{C}$ ; $t = 24\text{ h}$ )<br>b) Mechanical method (0.6 mm glass beads; $T = 4\text{ }^{\circ}\text{C}$ ; 10 times for 1 min on vortex)<br>2) RNA hydrolysis<br>a) cell extract + acetic acid 3% + deionized water ( $T = 25\text{ }^{\circ}\text{C}$ ; $t = 15\text{ min}$ )<br>b) cell extract + 0.3 M KOH ( $T = 37\text{ }^{\circ}\text{C}$ ; $t = 24\text{ h}$ ; neutralization with 0.5 M $\text{HClO}_4$ )<br>c) cell extract + 0.3 M KOH ( $T = 60\text{ }^{\circ}\text{C}$ ; $t = 24\text{ h}$ ; neutralization with 0.5 M $\text{HClO}_4$ ) | Nucleotide extraction for the production of flavor enhancers such as 5'GMP and 5'AMP.                                               | [39] |

**Table S2.** Price ranges of various SBY products, accessed on 14 January 2023.

| Product group | Product sales name                                                                             | Price [USD t <sup>-1</sup> ] | Source |
|---------------|------------------------------------------------------------------------------------------------|------------------------------|--------|
| Feed          | High Protein Inactive Dry Yeast / Animal Feed Yeast Price (min. order quantity 18 t)           | 61                           | [82]   |
|               | Manufacturer Supply Best Price Animal Feed Yeast Crude Protein 40%~55%;                        | 320                          | [83]   |
|               | Affordable Yeast Powder 50% 60% Animal Feed Protein                                            | 250                          | [84]   |
|               | <b>Average price</b>                                                                           | <b>210</b>                   |        |
| β-glucan      | Food Additives CAS 9012-72-0 Yeast Beta 1, 3 D Glucan Water Insoluble 70%                      | 35.000                       | [85]   |
|               | Yeast Extract Powder Food Grade Beta Glucan Powder 80%                                         | 85.000                       | [86]   |
|               | Top Quality Yeast Beta-Glucan, Beta Glucan Yeast                                               | 40.000                       | [87]   |
|               |                                                                                                | 70.000                       |        |
|               | Yeast Cell Wall, Yeast Extract, Yeast Beta Glucan for Food and Feed (min. order quantity 12 t) | 1.750                        | [88]   |
|               | <b>Average price</b>                                                                           | <b>46.350</b>                |        |
| Mannoprotein  | Winemaking Supplies Price List                                                                 | 225.000                      | [89]   |
|               | Mannofeel – carolinawinesupply                                                                 | 65.741                       | [90]   |
|               | Mannofeel-Winnica&Wino (exchange rate for Polish Zlot (PLN) to US dollar: 0,23)                | 822.760                      | [90]   |
|               | Angel MP60 Yeast Extract Mannoprotein for Wine Fermentation stability (min. order quantity 1t) | 90.000                       | [91]   |
|               | <b>Average price</b>                                                                           | <b>300.875</b>               |        |
| Chitin        | Chem-Impex                                                                                     | 72.218                       | [92]   |
|               | Biosynth Carbosynth                                                                            | 150.000                      |        |
|               | Sigma-Aldrich                                                                                  | 349.000                      |        |
|               | <b>Average price</b>                                                                           | <b>190.406</b>               |        |
| Glycogen      | AK Scientific                                                                                  | 3.078.000                    | [93]   |
|               | Biosynth Carbosynth (from oyster)                                                              | 13.000.000                   |        |
|               | Matrix Scientific                                                                              | 3.990.000                    |        |
|               | <b>Average price</b>                                                                           | <b>6.689.333</b>             |        |

**Table S3.** Heat energy demand for extraction processes in relation to biogas primary energy supply per ton dry matter of SBY.

| Yeast strain                        | Heat related process conditions | Temperature | Time | Ambient temperature | Temperature difference | Energy demand         | Heat maintenance* | Heat demand total | Biogas energy supply of the residue | Share in extraction heat demand in primary biogas energy supply |
|-------------------------------------|---------------------------------|-------------|------|---------------------|------------------------|-----------------------|-------------------|-------------------|-------------------------------------|-----------------------------------------------------------------|
|                                     |                                 | [°C]        | [h]  | [°C]                | [°C]                   | [MJ t <sup>-1</sup> ] | [MJ]              | [MJ]              | [MJ]                                |                                                                 |
| <i>Saccharomyces uvarum</i>         | Hot bath                        | 55          | 24   | 20                  | 35                     | 146                   | 16.7              | 147               | 10.055                              | 2%                                                              |
|                                     | Autolysis                       | 85          | 15   | 20                  | 65                     | 272                   | 10.5              | 282               |                                     | 3%                                                              |
|                                     | Proteolysis                     | 55          | 5    | 20                  | 35                     | 146                   |                   | 146               |                                     | 2%                                                              |
| <i>Saccharomyces carlsbergensis</i> | Alkaline extraction             | 90          | 2    | 20                  | 70                     | 293                   |                   | 293               |                                     | 3%                                                              |
| <i>Saccharomyces pastorianus</i>    | Autolysis                       | 50          | 24   | 20                  | 30                     | 126                   | 16.7              | 142               |                                     | 1%                                                              |
|                                     | Alkaline extraction             | 82.5*       | 2    | 20                  | 62.5                   | 262                   |                   | 262               |                                     | 3%                                                              |
|                                     | Acid extraction                 | 77.5*       | 1    | 20                  | 57.5                   | 241                   |                   | 241               |                                     | 3%                                                              |

\* mean value

\*\*assuming 1 °C loss each 6 hours
